# Supplementary material for: Novel RAB3GAP1 Mutation in the First Tunisian Family With Warburg Micro Syndrome
Source: PubMed Central journal article supplement — J Clin Neurol. 2022 Feb 14;18(2):214–22. doi: 10.3988/jcn.2022.18.2.214 (PMC8926778; doi:10.3988/jcn.2022.18.2.214), 2022-02-14
Supplement: jcn-18-214-s002.pdf [file jcn-18-214-s002.pdf]

**Supplementary Table 1.** Primer sequences

| <b>Primer</b> | <b>Forward sequence (5' → 3')</b> | <b>Reverse sequence (5' → 3')</b> | <b>Annealing temperature</b> | <b>Product size</b> |
|---------------|-----------------------------------|-----------------------------------|------------------------------|---------------------|
| RAB3GAP1      | gcaatatcaaaactgcatgatct           | tcctctggactttgcctcat              | 54°C                         | 380 bp              |
| ABCD1         | acagtgccatccggttacctg             | acacctttggcatcagcc                | 58°C                         | 575 bp              |
