# Supplementary material for: Novel RAB3GAP1 Mutation in the First Tunisian Family With Warburg Micro Syndrome
Source: PubMed Central journal article supplement — J Clin Neurol. 2022 Feb 14;18(2):214–22. doi: 10.3988/jcn.2022.18.2.214 (PMC8926778; doi:10.3988/jcn.2022.18.2.214), 2022-02-14
Supplement: jcn-18-214-s003.pdf [file jcn-18-214-s003.pdf]

**Supplementary Table 2.** Results from in silico prediction tools for the *ABCD1* mutation

| In-silico tool                                                                                                                              | Prediction        | Score    |
|---------------------------------------------------------------------------------------------------------------------------------------------|-------------------|----------|
| Polyphen-2 <sup>1</sup> ( <a href="http://genetics.bwh.harvard.edu/pph2/index.shtml">http://genetics.bwh.harvard.edu/pph2/index.shtml</a> ) | Probably damaging | 0.999    |
| Provean <sup>2</sup> ( <a href="http://provean.jcvi.org/">http://provean.jcvi.org/</a> )                                                    | Deleterious       | -7.01    |
| MutationTaster <sup>3</sup> ( <a href="http://www.mutationtaster.org/">http://www.mutationtaster.org/</a> )                                 | Disease-causing   | 29       |
| UMD-Predictor <sup>4</sup> ( <a href="http://umd-predictor.eu/">http://umd-predictor.eu/</a> )                                              | Pathogenic        | 96       |
| SNPs & GO <sup>5</sup> ( <a href="https://snps-and-go.biocomp.unibo.it/snps-and-go">https://snps-and-go.biocomp.unibo.it/snps-and-go</a> )  | Disease           | 10       |
| PredictSNP <sup>6</sup> ( <a href="https://loschmidt.chemi.muni.cz/predictsnp/">https://loschmidt.chemi.muni.cz/predictsnp/</a> )           | Deleterious       | 1        |
| CADD <sup>7</sup> ( <a href="https://cadd.gs.washington.edu/">https://cadd.gs.washington.edu/</a> )                                         | Deleterious       | 20.8     |
| DANN <sup>8</sup> ( <a href="https://cbcl.ics.uci.edu/public_data/DANN/">https://cbcl.ics.uci.edu/public_data/DANN/</a> )                   | Deleterious       | 0.995689 |
| FATHMM <sup>9</sup> ( <a href="http://fathmm.biocompute.org.uk/">http://fathmm.biocompute.org.uk/</a> )                                     | Deleterious       | 0.94158  |
| GWAVA <sup>10</sup> ( <a href="https://www.sanger.ac.uk/tool/gwava">https://www.sanger.ac.uk/tool/gwava</a> )                               | Deleterious       | 0.37     |

## REFERENCES

1. Adzhubei IA, Schmidt S, Peshkin L, Ramensky VE, Gerasimova A, Bork P, et al. A method and server for predicting damaging missense mutations. *Nat Methods* 2010;7:248-249.
2. Choi Y, Sims GE, Murphy S, Miller JR, Chan AP. Predicting the functional effect of amino acid substitutions and indels. *PLoS One* 2012;7:e46688.
3. Schwarz JM, Cooper DN, Schuelke M, Seelow D. MutationTaster2: mutation prediction for the deep-sequencing age. *Nat Methods* 2014;11:361-362.
4. Salgado D, Desvignes JB, Rai G, Blanchard A, Miltgen M, Pinard A, et al. UMD-predictor: a high-throughput sequencing compliant system for pathogenicity prediction of any human cDNA substitution. *Hum Mutat* 2016;37:439-446.
5. Calabrese R, Capriotti E, Fariselli P, Martelli PL, Casadio R. Functional annotations improve the predictive score of human disease-related mutations in proteins. *Hum Mutat* 2009;30:1237-1244.
6. Bendl J, Stourac J, Salanda O, Pavelka A, Wieben ED, Zendulka J, et al. PredictSNP: robust and accurate consensus classifier for prediction of disease-related mutations. *PLoS Comput Biol* 2014;10:e1003440.
7. Kircher M, Witten DM, Jain P, O'Roak BJ, Cooper GM, Shendure J. A general framework for estimating the relative pathogenicity of human genetic variants. *Nat Genet* 2014;46:310-315.
8. Quang D, Chen Y, Xie X. DANN: a deep learning approach for annotating the pathogenicity of genetic variants. *Bioinformatics* 2015;31:761-763.
9. Shihab HA, Gough J, Cooper DN, Stenson PD, Barker GL, Edwards KJ, et al. Predicting the functional, molecular, and phenotypic consequences of amino acid substitutions using hidden Markov models. *Hum Mutat* 2013;34:57-65.
10. Shihab HA, Rogers MF, Gough J, Mort M, Cooper DN, Day IN, et al. An integrative approach to predicting the functional effects of non-coding and coding sequence variation. *Bioinformatics* 2015;31:1536-1543.
