# Supplementary figures and images for: Novel RAB3GAP1 Mutation in the First Tunisian Family With Warburg Micro Syndrome
Source: PubMed Central journal article supplement — J Clin Neurol. 2022 Feb 14;18(2):214–22. doi: 10.3988/jcn.2022.18.2.214 (PMC8926778; doi:10.3988/jcn.2022.18.2.214), 2022-02-14

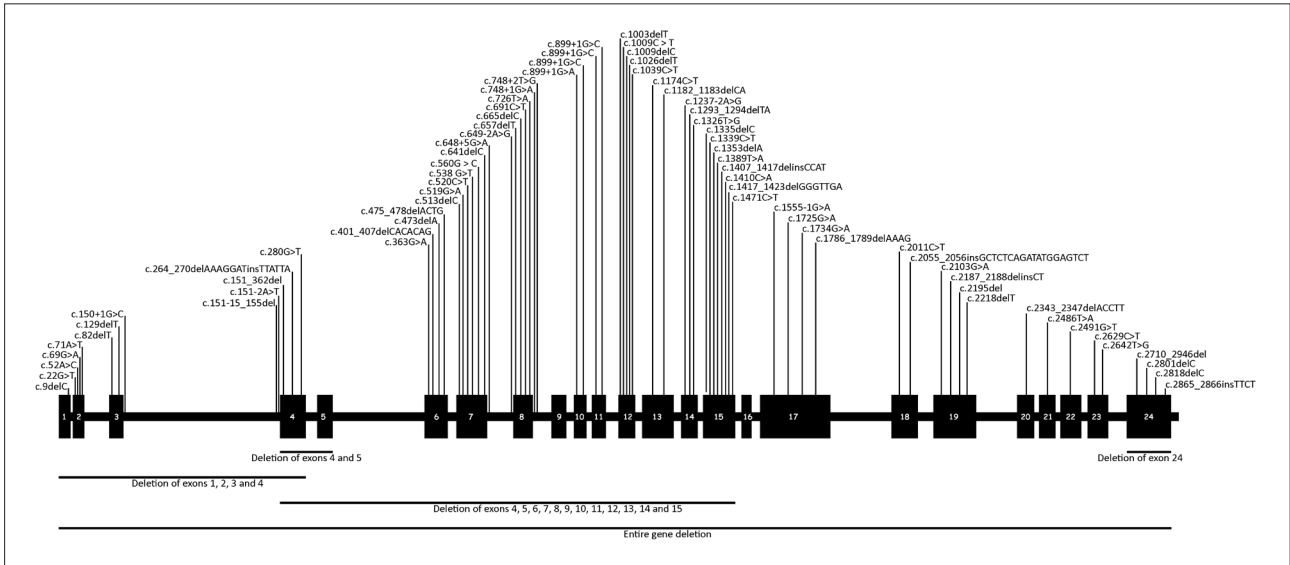

**Supplementary Fig. 1.** Reported *RAB3GAP1* mutations in patients with Warburg Micro syndrome.

Supplement: jcn-18-214-s001.pdf [file jcn-18-214-s001.pdf]
